# Supplementary material
Source: Springer Nature journal article supplement (https://www.springermedizin.de/resource/supplementary/13033_2014_195_MOESM2_ESM.pdf/9652042)

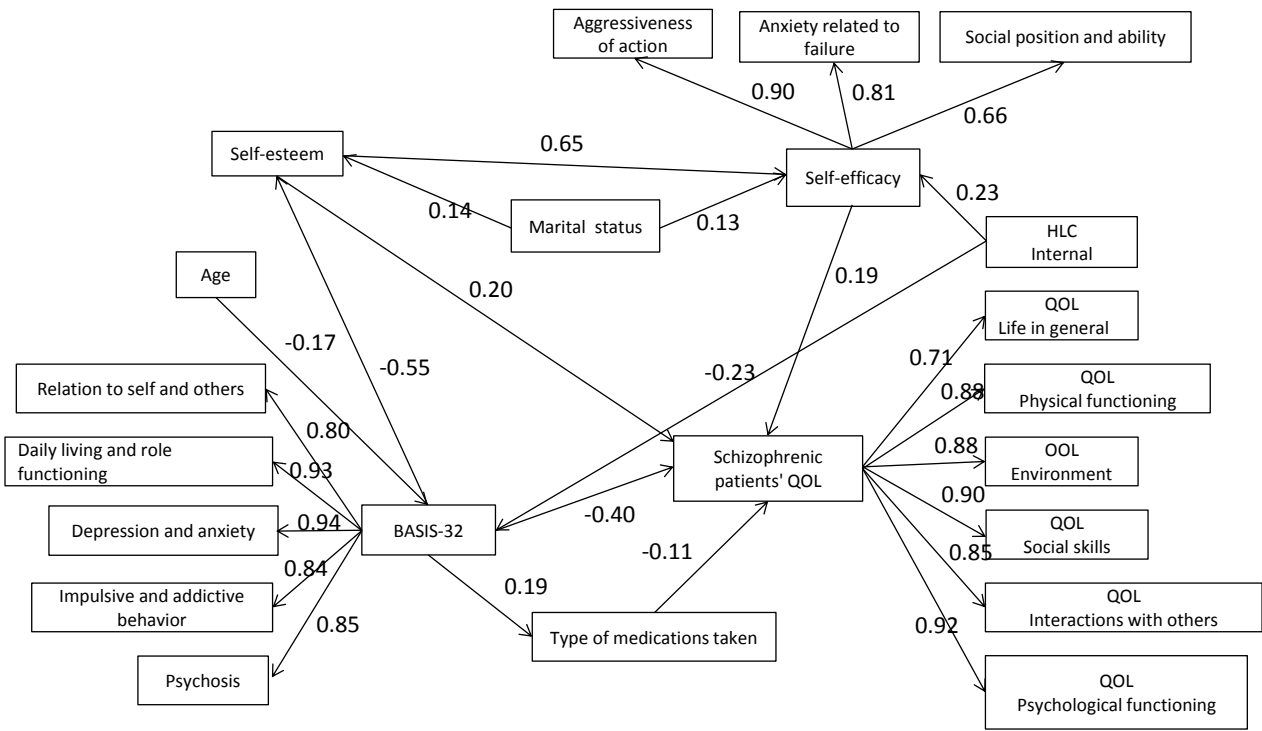

chi-squared=22.087  
 df=16  
 $\chi^2/df=1.380$   
 GFI=0.938  
 AGFI=0.859  
 CFI=0.960  
 RMSEA=0.070  
 AIC=68.087

Supplement: MOESM2 [file 9652042]
